# Supplementary material for: The nanoporous PdCr alloy as a nonenzymatic electrochemical sensor for hydrogen peroxide and glucose
Source: Royal Society of Chemistry journal article supplement (doi:10.1039/c3tb21778g), 2014-01-01
Supplement: c3tb21778g1.pdf [file c3tb21778g1.pdf]

Supporting Information:

**Nanoporous PdCr alloy as nonenzymatic electrochemical sensor  
for hydrogen peroxide and glucose**

Dianyun Zhao,<sup>a</sup> Zhihong Wang,<sup>b</sup> Jinping Wang,<sup>a</sup> and Caixia Xu<sup>a\*</sup>

<sup>a</sup> *Key Laboratory of Chemical Sensing & Analysis in Universities of Shandong,  
School of Chemistry and Chemical Engineering, University of Jinan, Jinan 250022,  
China*

<sup>b</sup> *School of Basic Medical Sciences, Shandong University of Traditional Chinese  
Medicine, Jinan 250355, China*

Fax: +86-531-82765969; Tel: +86-531-89736103

\*Email: [chm\\_xucx@ujn.edu.cn](mailto:chm_xucx@ujn.edu.cn) (C. Xu)

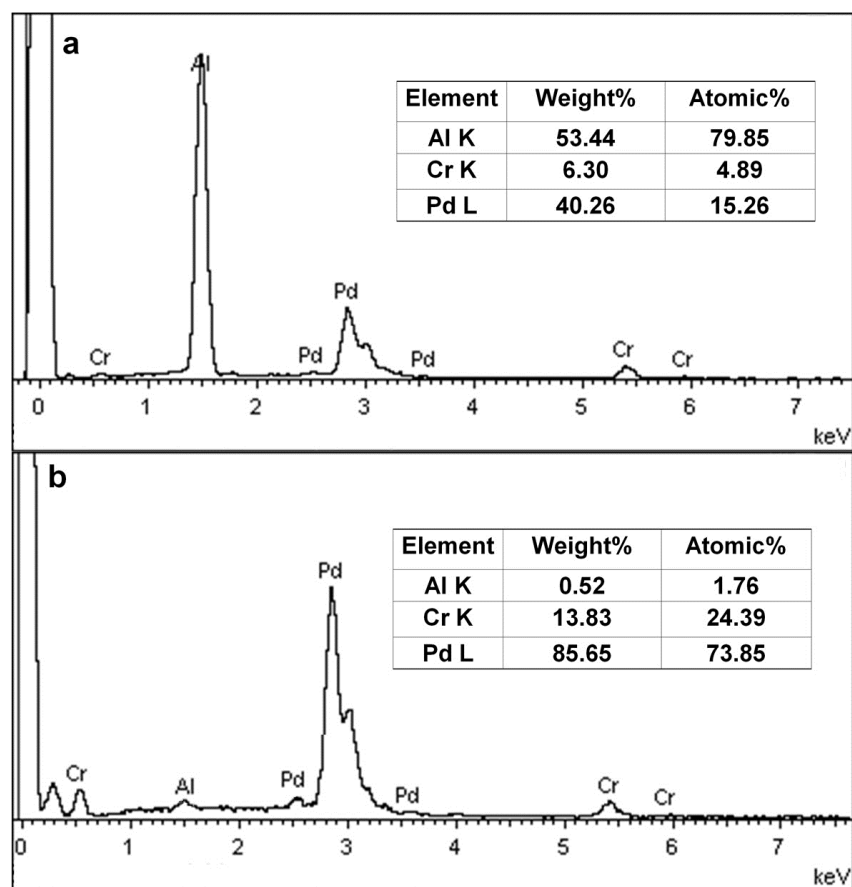

**Fig. S1.** EDS data of PdCrAl alloy (a) and the resulted PdCr sample (b) after dealloying.
